# Supplementary material for: Synthesis of wurtzite CuInS2 nanowires by Ag2S-catalyzed growth
Source: Royal Society of Chemistry journal article supplement (doi:10.1039/c2ce26944a), 2013-01-01
Supplement: c2ce26944a.pdf [file c2ce26944a.pdf]

Supporting Information

### Synthesis of wurtzite CuInS<sub>2</sub> nanowires by Ag<sub>2</sub>S-catalyzed growth

Qiang Li,<sup>a</sup> Chao Zou,<sup>a,b</sup> Lanlan Zhai,<sup>\*a</sup> Lijie Zhang,<sup>a</sup> Yun Yang,<sup>a</sup> Xi'an Chen<sup>a</sup> and Shaoming Huang<sup>\*a</sup>

<sup>a</sup> Nanomaterials & Chemistry Key Laboratory, College of Chemistry and Material Engineering,  
Wenzhou University, Wenzhou 325027, P. R. China

<sup>b</sup> State Key Laboratory of Silicon Materials, Zhejiang University, Hangzhou 310027, People's Republic  
of China

E-mail: zhail@wzu.edu.cn, smhuang@wzu.edu.cn

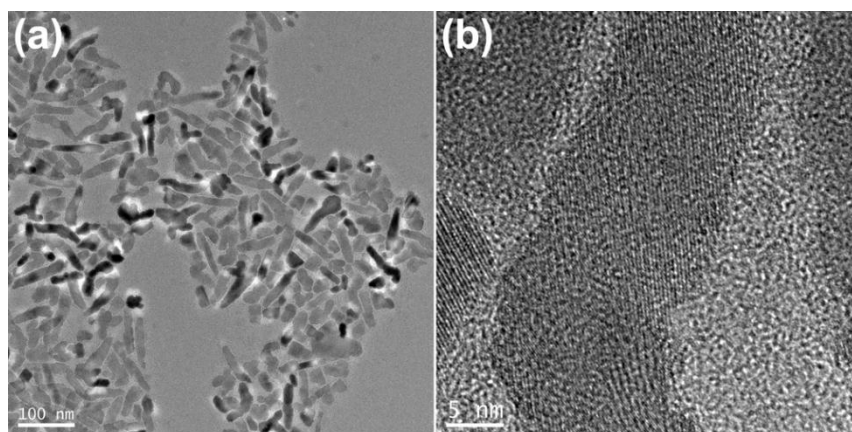

Figure S1 TEM images of CuInS<sub>2</sub> nanocrystals obtained in the absence of Ag<sub>2</sub>S.

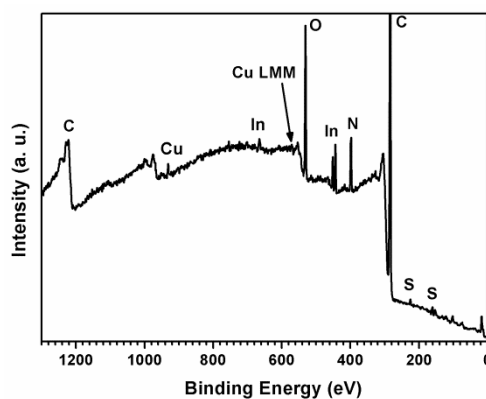

Figure S2. XPS survey of CuInS<sub>2</sub> nanowires obtained in the presence of Ag<sub>2</sub>S.

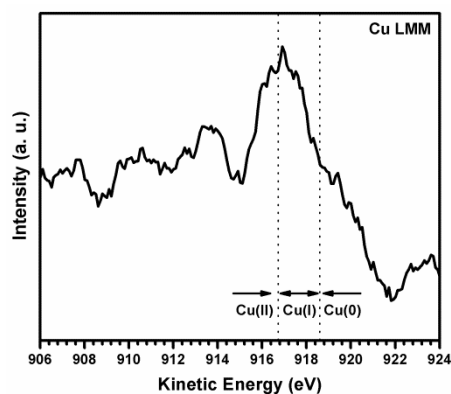

Figure S3. AES spectrum in the Cu LMM region for CuInS<sub>2</sub> nanowires.
